# Supplementary material for: The influence of spatiality on shipping emissions, air quality and potential human exposure in the Yangtze River Delta/Shanghai, China
Source: Copernicus journal article supplement (doi:10.5194/acp-19-6167-2019), 2019-05-09
Supplement: Supplementary file 1 [file acp-19-6167-2019-supplement.pdf]

Supplement of Atmos. Chem. Phys., 19, 6167–6183, 2019  
<https://doi.org/10.5194/acp-19-6167-2019-supplement>  
© Author(s) 2019. This work is distributed under  
the Creative Commons Attribution 4.0 License.

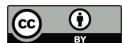

*Supplement of*

## **The influence of spatiality on shipping emissions, air quality and potential human exposure in the Yangtze River Delta/Shanghai, China**

**Junlan Feng et al.**

*Correspondence to:* Yan Zhang ([yan\\_zhang@fudan.edu.cn](mailto:yan_zhang@fudan.edu.cn))

The copyright of individual parts of the supplement might differ from the CC BY 4.0 License.

## Supporting information

### The influence of spatiality on shipping emissions, air quality and potential human exposure in Yangtze River Delta/Shanghai, China

Junlan Feng<sup>1</sup>, Yan Zhang<sup>1,2,3\*</sup>, Shanshan Li<sup>1</sup>, Jingbo Mao<sup>1</sup>, Allison P. Patton<sup>4</sup>, Yuyan Zhou<sup>1</sup>, Weichun Ma<sup>1,3</sup>, Cong Liu<sup>5</sup>, Haidong Kan<sup>5</sup>, Cheng Huang<sup>6</sup>, Jingyu An<sup>6</sup>, Li Li<sup>6</sup>, Yin Shen<sup>7</sup>, Qingyan Fu<sup>7</sup>, Xinning Wang<sup>7</sup>, Juan Liu<sup>7</sup>, Shuxiao Wang<sup>8</sup>, Dian Ding<sup>8</sup>, Jie Cheng<sup>9</sup>, Wangqi Ge<sup>9</sup>, Hong Zhu<sup>9</sup>, Katherine Walker<sup>4</sup>

<sup>1</sup> Shanghai Key Laboratory of Atmospheric Particle Pollution and Prevention (LAP3), Department of Environmental Science and Engineering, Fudan University, Shanghai 200438, China

<sup>2</sup> Institute of Atmospheric Sciences, Fudan University, Shanghai 200438, China

<sup>3</sup> Shanghai Institute of Eco-Chongming (SIEC), Shanghai 200062, China

<sup>4</sup> Health Effects Institute, 75 Federal Street, Suite 1400, Boston, MA 02110-1817, USA

<sup>5</sup> Public Health School, Fudan University, Shanghai 200032, China

<sup>6</sup> Shanghai Academy of Environmental Science, Shanghai 200233, China

<sup>7</sup> Shanghai Environmental Monitoring Center, Shanghai 200030, China

<sup>8</sup> State Key Joint Laboratory of Environment Simulation and Pollution Control, School of Environment, Tsinghua University, Beijing 100084, China

<sup>9</sup> Shanghai Urban-rural Construction and Transportation Development Research Institute, Shanghai 200032, China

*Correspondence to:* Yan Zhang (yan\_zhang@fudan.edu.cn)

#### Summary of contents:

Additional Material and Methods

S1 Estimation of ship emissions

S2 Fuel type, sulfur content, engine type, emission Factors, low load adjustment multipliers, and control factors

S3 Calculation of statistical metrics in the model evaluation

#### Additional Figures and Tables

1. Figure S1 Nested simulation domains 1 to 4 in this study

2. Table S1 Pollution sources and pollutant types in national-scale non-shipping emission inventories

3. Table S2 Pollution sources and pollutant types in local-scale non-shipping emission inventories

4. Table S3 Inputs for each run of the simulations

5. Table S4 Average and peak contributions from ship emissions in different offshore coastal areas to the land ambient PM<sub>2.5</sub> concentrations in January and June

## Additional Material and Methods

### S.1 Estimation of ship emissions

Marine vessel emissions were calculated based on a bottom-up activity-based method.

The main engine load factor,  $LF_m$ , was calculated as

$$LF_m = (\text{ActSpeed} / \text{MaxSpeed})^3 \quad (1)$$

where ActSpeed is the actual speed when ship is cruising and MaxSpeed is the maximum speed for the ship.

Main engine emissions in grams,  $E_m$ , were calculated as

$$E_m = P_m \times LF_m \times LLAM \times T_m \times EF_m \times FCF_m \times CF_m \quad (2)$$

where  $P_m$  is the installed power of ME (kw), LLAM is the low load adjustment multiplier for the main engine,  $T_m$  is operation time of the main engine (h),  $EF_m$  is the main engine emissions factor (g/kwh),  $FCF_m$  is the main engine fuel correction factor, and  $CF_m$  is the main engine control factor.

Auxiliary engine emissions in grams,  $E_a$ , were calculated as

$$E_a = P_a \times LF_a \times T_a \times EF_a \times CF_a \quad (3)$$

where  $P_a$  is the installed power of the auxiliary engine (kw),  $LF_a$  is auxiliary engine load factors,  $T_a$  is operation time of the auxiliary engine (h),  $EF_a$  is auxiliary engine emissions factors (g/kwh), and  $CF_a$  is auxiliary engine control factors.

Auxiliary boiler emissions in grams,  $E_b$ , are generally calculated as

$$E_b = P_b \times LF_b \times T_b \times EF_b \times CF_b \quad (4)$$

where  $P_b$  is the installed power of the auxiliary boiler (kw),  $LF_b$  is AB load factors,  $T_b$  is operation time of the auxiliary boiler (h),  $EF_b$  is auxiliary boiler emissions factors (g/kwh), and  $CF_b$  is auxiliary boiler control factors. However, auxiliary boiler emissions were not considered in this study because limited auxiliary boiler information exists in the Lloyd's register and Chinese Classification Society (CCS) database.

The total emissions of the ship in grams,  $E$ , was

$$E = E_m + E_a + E_b \quad (5).$$

For ships available in Lloyd's register (now IHS-Fairplay) (Lloyds, 2015) and CCS database, the following data were derived from these database including: ship name, ship type, date of construction, flag name, revolutions per minute (RPM) of the main engine, speed, maximum design power of the main engine, maximum design power of the auxiliary engines and gross

tonnage. Information of some domestic ships is available in CCS database, but for those ships unavailable in the database, default values of the main engine power averages were uniformly applied to different ship types: oil tankers (2400 kw), container cargo ships (5000 kw), non-container cargo ships (3800 kw), passenger ships (2300 kw) and other types of ships (2300 kw).

## **S.2 Fuel type, sulfur content, engine type, emission Factors, low load adjustment multipliers, and control factors**

The two most common fuel oils used in ships are residual oil (RO) and marine distillates (MD). In general, RO is used in the main engine, and the fuel sulfur content is approximately 2.7%, MD is used in the auxiliary engine, and the sulfur content is approximately 0.5%. On the basis of data on ships passing by the Port of Shanghai provided by the largest Chinese heavy fuel oil (HFO) supplier, China Marine Bunker (CMB), the sulfur content of the fuel used by the main engines in domestic vessels ranges from 0.2% to 2.0%, and the sulfur content of the fuel used by the main engines in ocean-going vessels ranges from 1.9% to 3.5%. In this study, we adjusted the sulfur content of the fuel used by the main engines in domestic vessels to 1.5% and that of ocean-going vessels to 2.7%. The amount of SO<sub>2</sub> emitted is directly affected by the sulfur content of the fuel; therefore, when main engine emissions were estimated by the model, the emissions of domestic vessels were amended correspondingly. The main engine category was sorted into slow speed diesel (SSD), medium speed diesel (MSD), and high speed diesel (HSD) based on the engine revolutions per minute (RPM), and the largest auxiliary engine category was MSD. The type of engine was judged first according to the RPM of the main engine in Lloyd's database. The emission factors of the different types of engines differ considerably.

The emission factors for SO<sub>2</sub>, NO<sub>x</sub>, CO, NMVOCs, PM<sub>10</sub>, and PM<sub>2.5</sub> come primarily from the data published in Cooper (2004), ICF International (2009), and Goldsworthy and Goldsworthy (2015). Emissions factors for OC and EC were obtained from published data in Agrawal et al. (2008a), Agrawal et al. (2008b), Petzold et al. (2011), and Moldanová et al. (2013). Emission factors used in the present study were listed in Fan et al. (2016). Emission factors are adjusted for loads below 20 % using tables from studies conducted in other countries (ICF International, 2009; Starcrest Consulting Group, 2009). Because adjustment multipliers were not available for organic carbon (OC) and elemental carbon (EC), these pollutants were assigned the same low load adjustment multiplier (LLAM) as PM in the present study, which may introduce uncertainties. In this study, the ratio of BC emissions to PM emissions (BC/PM) was around 2.9%, which falls within the range of 2% to 4.5% in other studies (Comer et al., 2017; Erying et al., 2005; Petzold et al., 2004).

For all marine engines over 130 kilowatts (kW) for engines built on or after January 1, 2000, NO<sub>x</sub> limits in Annex VI applied. We used a control factor of 0.9024 for main engines and a factor of 0.906 for auxiliary engines to adjust the NO<sub>x</sub> emissions. For vessels built after 2010, and thus complying with “IMO Tier 2”, we used a main engine control factor of 0.875 and an auxiliary

engine control factor of 0.8767 to adjust main engine emissions from ships with emission controls. The control factors were from ICF International (2009). The detailed low load adjustment multipliers and control factors were listed in Fan et al. (2016).

### S.3 Calculation of statistical metrics in the model evaluation

The statistical metrics in the model evaluation include Normalized Mean Bias (NMB), Normalized Mean Error (NME), Root Mean-square Error (RMSE), and Pearson's correlation coefficient ( $r$ ). The statistical metrics are calculated as follows:

$$\text{NMB} = \frac{\sum_{i=1}^n (S_i - O_i)}{\sum_{i=1}^n O_i} \times 100\% \quad (6)$$

$$\text{NME} = \frac{\sum_{i=1}^n |S_i - O_i|}{\sum_{i=1}^n O_i} \times 100\% \quad (7)$$

$$\text{RMSE} = \sqrt{\frac{\sum_{i=1}^n (S_i - O_i)^2}{n}} \quad (8)$$

$$r = \frac{\sum_{i=1}^n (S_i - \bar{S})(O_i - \bar{O})}{\sqrt{\sum_{i=1}^n (S_i - \bar{S})^2 \sum_{i=1}^n (O_i - \bar{O})^2}} \quad (9)$$

Where:

$S_i$  = the daily-average simulated data at a certain monitoring station, day  $i$

$O_i$  = the daily-average observation data at a certain monitoring station, day  $i$

$\bar{S}$  = the average simulated data at a certain monitoring station of all days

$\bar{O}$  = the average observation data at a certain monitoring station of all days

$n$  = the total numbers of days of the monitoring stations for which the simulated results are compared with the observed ones

## References:

- Agrawal, H., Malloy, Q. G. J., Welch, W. A., Miller, J. W., and Iii, D. R. C.: In-use gaseous and particulate matter emissions from a modern ocean going container vessel, *Atmos. Environ.*, 42, 5504-5510, 10.1016/j.atmosenv.2008.02.053, 2008a.
- Agrawal, H., Welch, W. A., Miller, J. W., and Cocker, D. R.: Emission Measurements from a Crude Oil Tanker at Sea, *Environ. Sci. Technol.*, 42, 7098, 10.1021/es703102y, 2008b.
- Comer, B., Olmer, N., Mao, X., Roy, B., and Rutherford, D.: Black Carbon Emissions and Fuel Use in Global Shipping, 2015, The International Council on Clean Transportation, 2017.
- Retrieved from [https://www.theicct.org/sites/default/files/publications/Global-Marine-BC-Inventory-2015\\_ICC-T-Report\\_15122017\\_vF.pdf](https://www.theicct.org/sites/default/files/publications/Global-Marine-BC-Inventory-2015_ICC-T-Report_15122017_vF.pdf)
- Cooper, D.: Methodology for calculating emissions from ships: 1. Update of emission factors, *Swedish Methodology for Environmental Data (SMED)*, 2004.
- Eyring, V., Köhler, H. W., Aardenne, J., and Lauer, A.: Emissions from international shipping: 1. The last 50 years, *J. Geophys. Res.*, 110, 10.1029/2004jd005619, 2005
- Fan, Q., Zhang, Y., Ma, W., Ma, H., Feng, J., Yu, Q., Yang, X., Ng, S. K., Fu, Q., and Chen, L.: Spatial and Seasonal Dynamics of Ship Emissions over the Yangtze River Delta and East China Sea and Their Potential Environmental Influence, *Environ. Sci. Technol.*, 50, 1322-1329, 10.1021/acs.est.5b03965, 2016.
- Goldsworthy, L., and Goldsworthy, B.: Modelling of ship engine exhaust emissions in ports and extensive coastal waters based on terrestrial AIS data - An Australian case study, Elsevier Science Publishers B. V., 45-60 pp., 2015.
- ICF International: Current methodologies in preparing mobile source port-related emission inventories, 2009.
- Lloyd 's register (IHS Fairplay). 2015.
- Moldanov á J., Fridell, E., Winnes, H., and Holminfridell, S.: Physical and chemical characterisation of PM emissions from two ships operating in European Emission Control Areas, *Atmos. Meas. Tech.*, 6, 3577-3596, 10.5194/amt-6-3577-2013, 2013.
- Petzold, A., Feldpausch, P., Fritzsche, L., Minikin, A., Lauer, P., Kurok, C., and Bauer, H.: Particle emissions from ship engines, *J. Aerosol Sci.*, Abstracts of the European Aerosol Conference,

S1095–S1096, 2004

Petzold, A., Lauer, P., Fritsche, U., Hasselbach, J., Lichtenstern, M., Schlager, H., and Fleischer, F.:

Operation of marine diesel engines on biogenic fuels: modification of emissions and resulting climate effects, *Environ. Sci. Technol.*, 45, 10394-10400, 10.1021/es2021439, 2011.

Starcrest Consulting Group: Port of Los Angeles Inventory of Air Emissions 2008, Technical Report Revision, 2009.

## Additional Figures and Tables

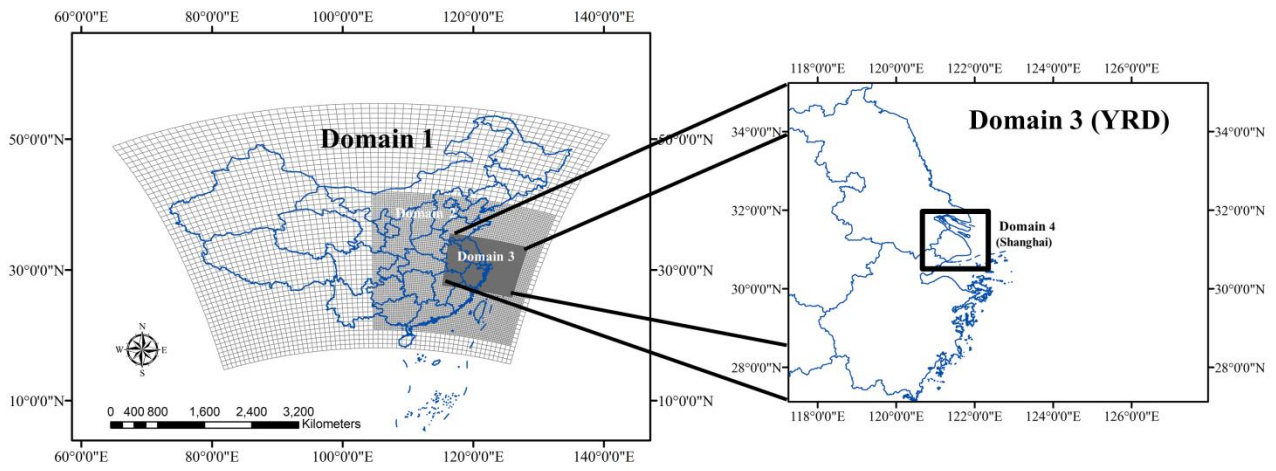

Figure S1. Nested simulation domains 1 to 4 in this study



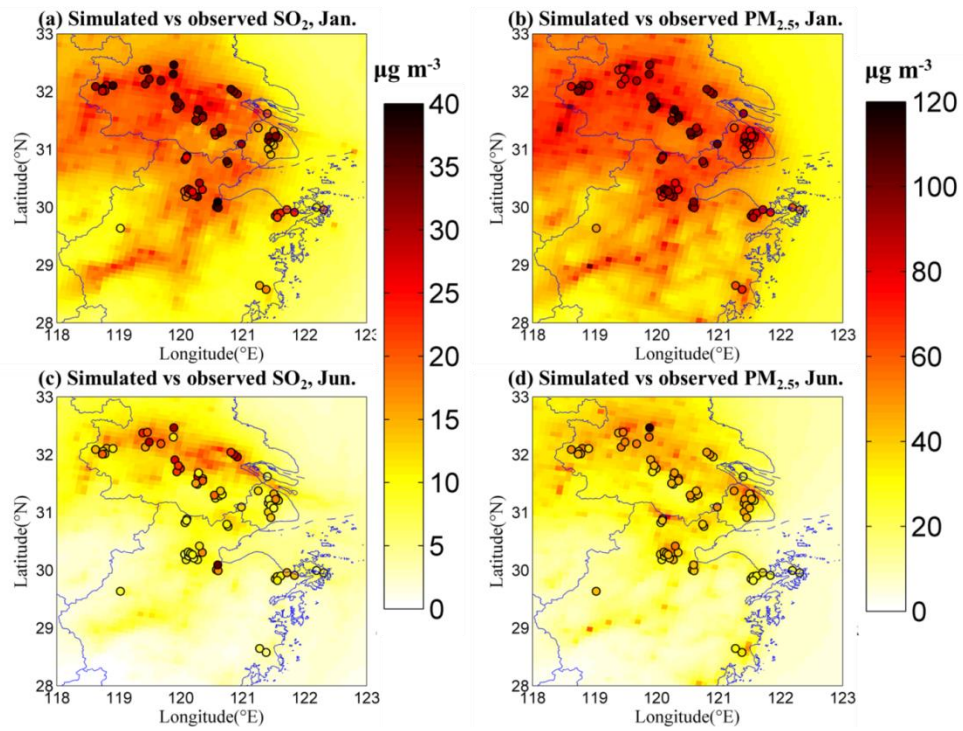

Figure S2. The simulated (grid) and observed (circles) SO<sub>2</sub> concentration distribution in YRD region, in January 2015 (a) and June 2015 (c); the simulated (grid) and observed (circles) PM<sub>2.5</sub> concentration distribution in YRD region, in January 2015 (b) and June 2015 (d)

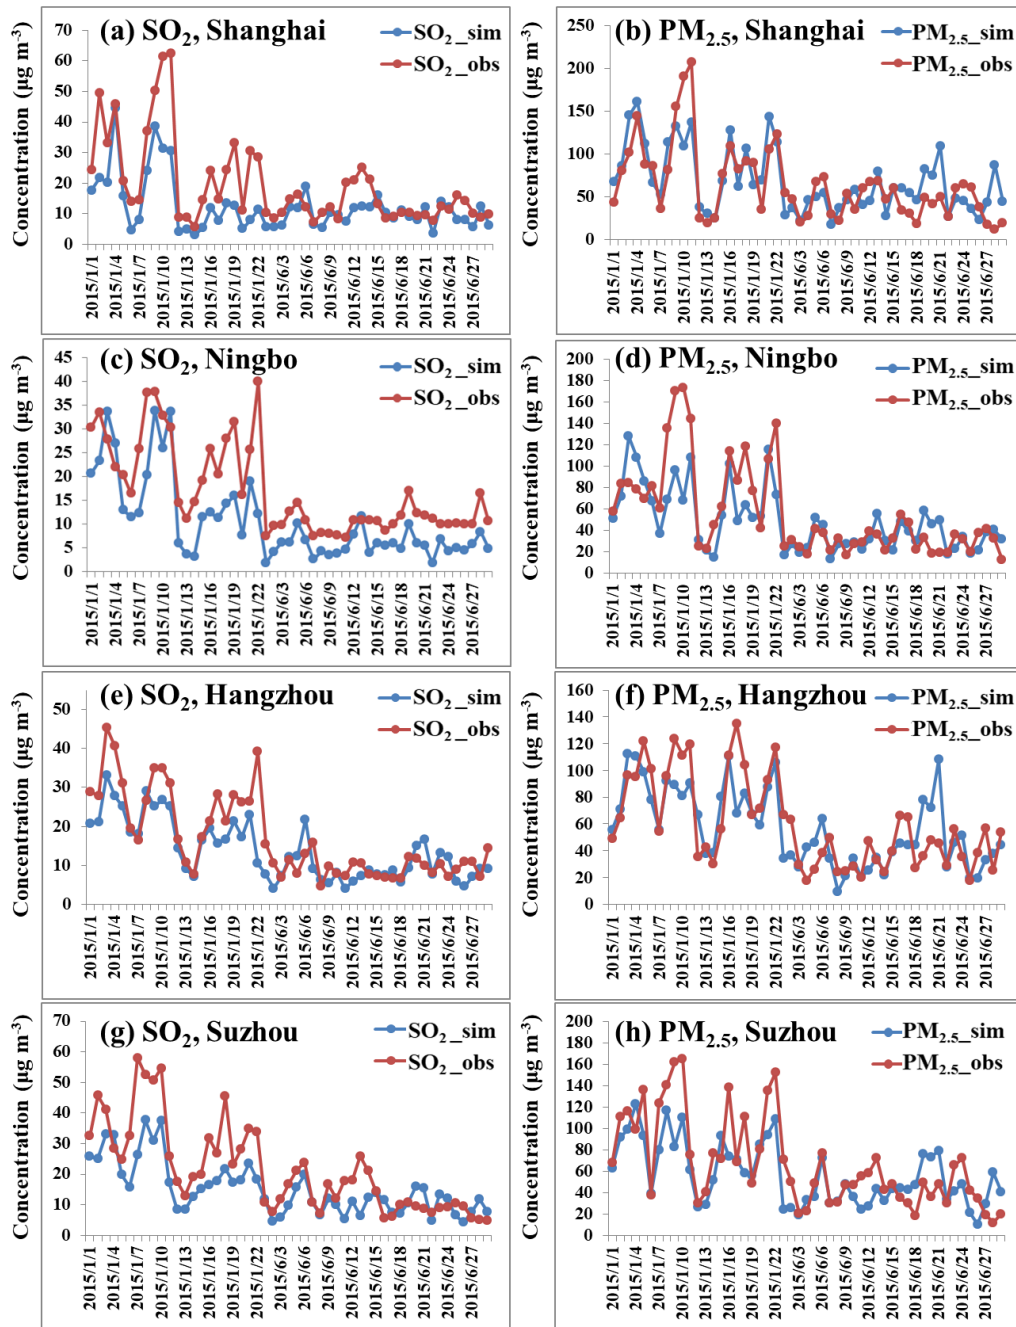

Figure S3. Daily variability of simulated (sim.) and observed (obs.) SO<sub>2</sub> concentrations (a, c, e, g) and PM<sub>2.5</sub> concentrations (b, d, f, h) in four representative cities, including two coastal cities – Shanghai (a, b) and Ningbo (c, d), and two inland cities – Hangzhou (e, f) and Suzhou (g, h).

Table S1. Pollution sources and pollutant types in national-scale non-shipping emission inventories

| Domain                  | Pollution source                                                                                                                                           | Pollutant type                                                                                                          |
|-------------------------|------------------------------------------------------------------------------------------------------------------------------------------------------------|-------------------------------------------------------------------------------------------------------------------------|
| Domain 1<br>(China) and | Power plant, steel, cement                                                                                                                                 | SO <sub>2</sub> , NO <sub>x</sub> , PM <sub>2.5</sub> ,<br>PM <sub>10</sub> , CO, NH <sub>3</sub>                       |
| Domain 2                | Industrial point source                                                                                                                                    | SO <sub>2</sub> , PM <sub>2.5</sub> , PM <sub>10</sub>                                                                  |
|                         | Industrial combustion, industrial process, domestic fuel<br>combustion, domestic biomass combustion, on-road traffic,<br>non-road traffic, open combustion | SO <sub>2</sub> , NO <sub>x</sub> , PM <sub>2.5</sub> ,<br>PM <sub>10</sub> , VOC <sub>s</sub> ,<br>CO, NH <sub>3</sub> |
|                         | Residential solvent, industrial solvent                                                                                                                    | VOC <sub>s</sub>                                                                                                        |
|                         | Agriculture, residential and commercial, waste                                                                                                             | CO, NH <sub>3</sub>                                                                                                     |

Table S2. Pollution sources and pollutant types in local-scale non-shipping emission inventories

| Domain                 | Pollution source                                                       | Pollutant type                                                                                                       |
|------------------------|------------------------------------------------------------------------|----------------------------------------------------------------------------------------------------------------------|
| Domain 3<br>(YRD), and | Power plant, industrial boiler,<br>industrial process, domestic source | SO <sub>2</sub> , NO <sub>x</sub> , PM <sub>2.5</sub> , PM <sub>10</sub> , CO, NH <sub>3</sub> ,<br>VOC <sub>s</sub> |
| Domain 4<br>(Shanghai) | On-road traffic                                                        | NO <sub>x</sub> , PM <sub>2.5</sub> , PM <sub>10</sub> , CO, NH <sub>3</sub> , VOC <sub>s</sub>                      |
|                        | Non-road traffic                                                       | SO <sub>2</sub> , NO <sub>x</sub> , PM <sub>2.5</sub> , PM <sub>10</sub> , CO, VOC <sub>s</sub>                      |
|                        | Dust                                                                   | PM <sub>2.5</sub> , PM <sub>10</sub>                                                                                 |
|                        | Agriculture                                                            | NH <sub>3</sub>                                                                                                      |

Table S3. Inputs for each run of the simulations

| <b>Run #</b>                | <b>Run name</b>                                              | <b>Land-Based Emissions</b>                  | <b>Shipping and port-related emissions</b>                                                                                |
|-----------------------------|--------------------------------------------------------------|----------------------------------------------|---------------------------------------------------------------------------------------------------------------------------|
| <i>Domain 1 (D1), 81-km</i> |                                                              |                                              |                                                                                                                           |
| 1                           | D1 baseline                                                  | National-scale land-based emission inventory | National scale shipping inventory based on AIS                                                                            |
| <i>Domain 2 (D2), 27-km</i> |                                                              |                                              |                                                                                                                           |
| 2                           | D2 baseline                                                  | National-scale land-based emission inventory | National scale shipping inventory based on AIS                                                                            |
| <i>Domain 3 (D3), 9-km</i>  |                                                              |                                              |                                                                                                                           |
| 3                           | D3 baseline                                                  | Local YRD land-based emission inventory      | Shipping emission inventory based on AIS                                                                                  |
| 4                           | Remove all coastal ships, ocean-going ships and inland ships | Local YRD land-based emission inventory      | Container trucks and port machineries                                                                                     |
| 5                           | Remove 12-200Nm shipping sources                             | Local YRD land-based emission inventory      | Shipping emissions inside 12 Nm                                                                                           |
| 6                           | Remove 24-200Nm shipping sources                             | Local YRD land-based emission inventory      | Shipping emissions inside 24 Nm                                                                                           |
| 7                           | Remove 48-200nm shipping sources                             | Local YRD land-based emission inventory      | Shipping emissions inside 48 Nm                                                                                           |
| 8                           | Remove 96-200nm shipping sources                             | Local YRD land-based emission inventory      | Shipping emissions inside 96 Nm                                                                                           |
| <i>Domain 4 (D4), 1 km</i>  |                                                              |                                              |                                                                                                                           |
| 10                          | D4 baseline                                                  | Local land-based emission inventory          | Local shipping inventory for inland-water ships and coastal ships, and container-cargo trucks and port terminal equipment |

---

|    |                                                                               |                                     |                                                                            |
|----|-------------------------------------------------------------------------------|-------------------------------------|----------------------------------------------------------------------------|
| 11 | Remove cargo trucks and port terminal equipment                               | Local land-based emission inventory | Inland-water ships, and coastal ships                                      |
| 12 | Remove inland-water ships (including international ships going on the rivers) | Local land-based emission inventory | Coastal ships, and container-cargo trucks and port terminal equipment      |
| 13 | Remove coastal ships                                                          | Local land-based emission inventory | Inland-water ships, and container-cargo trucks and port terminal equipment |

---

Table S4. Average and peak contributions from ship emissions in different offshore coastal areas to the ambient SO<sub>2</sub> and PM<sub>2.5</sub> concentrations in January and June

| Offshore distance       | Average contribution (µg/m <sup>3</sup> ) |       |                   |      | Maximum contribution (µg/m <sup>3</sup> ) |       |                   |      |
|-------------------------|-------------------------------------------|-------|-------------------|------|-------------------------------------------|-------|-------------------|------|
|                         | SO <sub>2</sub>                           |       | PM <sub>2.5</sub> |      | SO <sub>2</sub>                           |       | PM <sub>2.5</sub> |      |
|                         | January                                   | June  | January           | June | January                                   | June  | January           | June |
| Inland and within 12 NM | 0.52                                      | 0.70  | 0.24              | 0.56 | 6.00                                      | 8.79  | 1.62              | 4.02 |
| 12-24 NM                | 0.005                                     | 0.007 | 0.01              | 0.04 | 0.03                                      | 0.05  | 0.05              | 0.20 |
| 24-48 NM                | 0.01                                      | 0.009 | 0.04              | 0.07 | 0.06                                      | 0.05  | 0.11              | 0.34 |
| 48-96 NM                | 0.02                                      | 0.008 | 0.07              | 0.07 | 0.05                                      | 0.03  | 0.14              | 0.30 |
| 96-200 NM               | 0.00                                      | 0.001 | 0.003             | 0.01 | 0.004                                     | 0.003 | 0.02              | 0.05 |
